# Supplementary material for: A genome-scale CRISPR Cas9 dropout screen identifies synthetically lethal targets in SRC-3 inhibited cancer cells
Source: PubMed Central journal article supplement (PMC7994904; doi:10.1038/s42003-021-01929-1), 2021-03-25
Supplement: 42003_2021_1929_MOESM2_ESM.pdf [file 42003_2021_1929_MOESM2_ESM.pdf]

## Description of Additional Supplementary Files

**File Name:** Supplementary Data 1

**Description:**

- Comparison between the top mutated/amplified BC genes in SI-12 vs ICI screens (Fig. 8b).
- Summary of top 100 dropped out genes from the SI-12 screen (Fig. 2e).
- Top mutated and amplified genes in BC (data from TCGA).
- Sequences of commercial siRNA.

**File Name:** Supplementary Data 2

**Description:**

- Data underlying terrace plots from SI-12 screen (Fig. 2b).
- Data underlying DRACO plots from SI-12 screen (Fig. 2d).
- Data underlying olfactory receptors only terrace plots (Fig. 2f).
- Data underlying terrace plots from ICI screen (Fig. 8a).
- Data underlying cell viability experiments following siRNA perturbations (Fig. 3a, Fig. 3b, Fig. 3c)
- Data underlying cell viability experiments following drug treatments (Fig. 3d, Fig. 5, Fig. 6)•Data underlying organoid experiments (Fig 7).

**File Name:** Supplementary Data 3

**Description:**

- Summary of number of processed reads in SI-12 and ICI screens at all time points.
